# Supplementary material for: Life Cycle Assessment of Biomethane vs. Fossil Methane Production and Supply
Source: MDPI journal article supplement (doi:10.3390/en16124555), 2023-06-06
Supplement: s1 [file s1]

## **SUPPLEMENTARY MATERIALS**

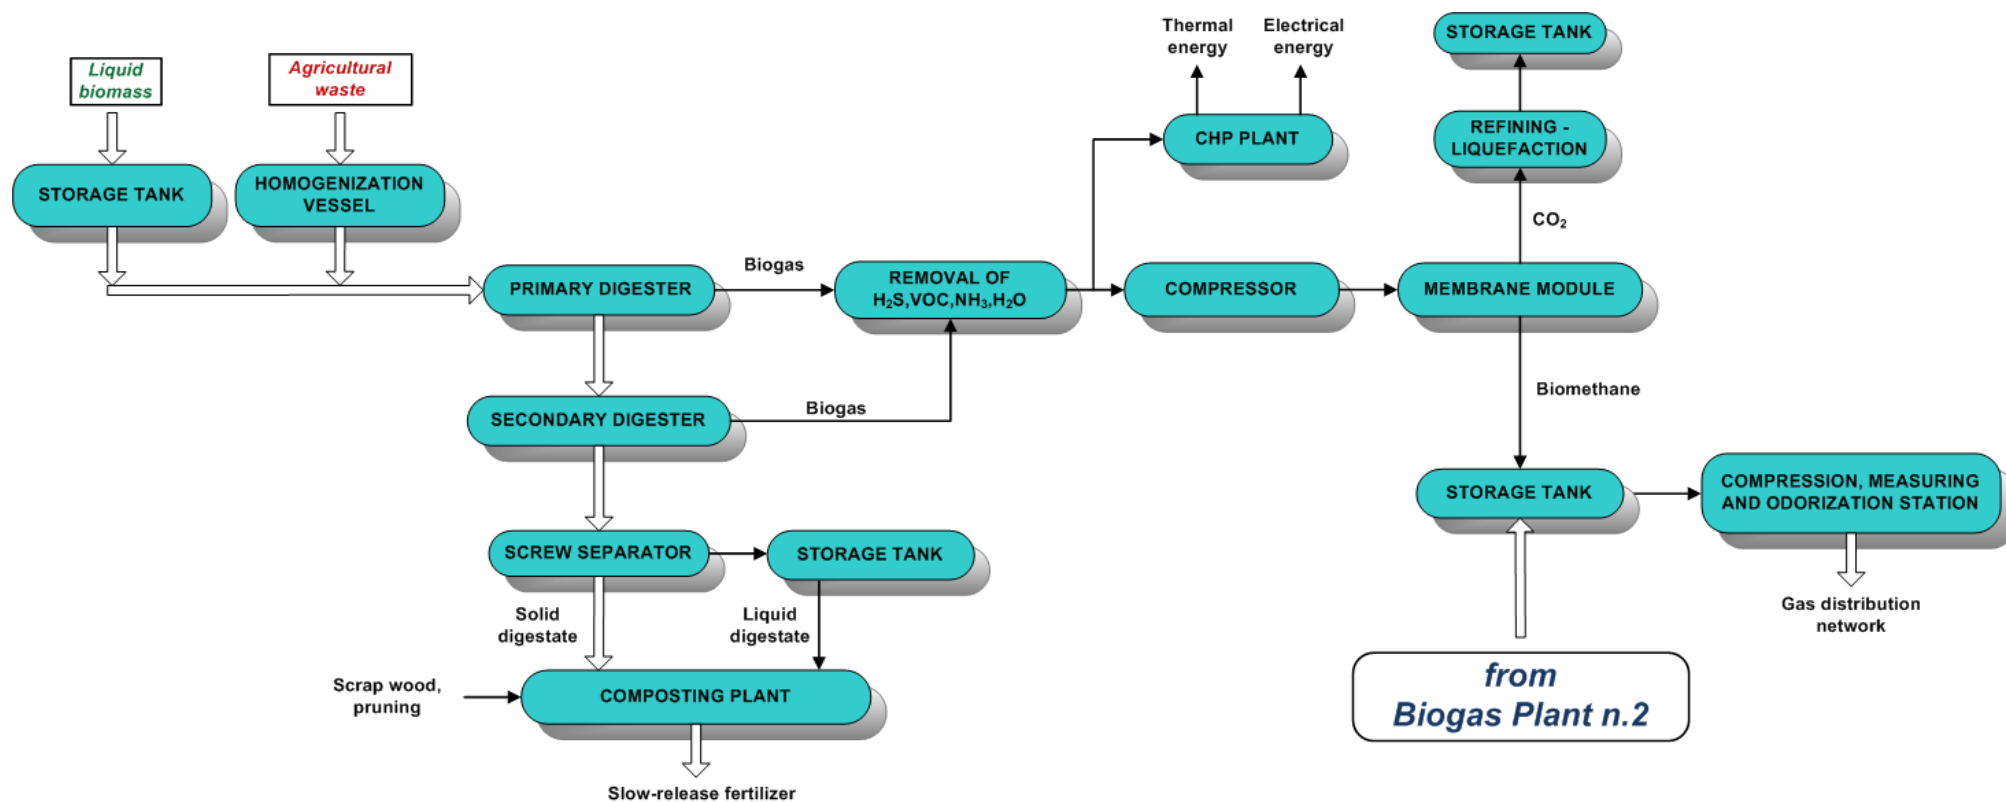

**Figure S1.** Flow-sheet of one of the two biogas plants producing biomethane.



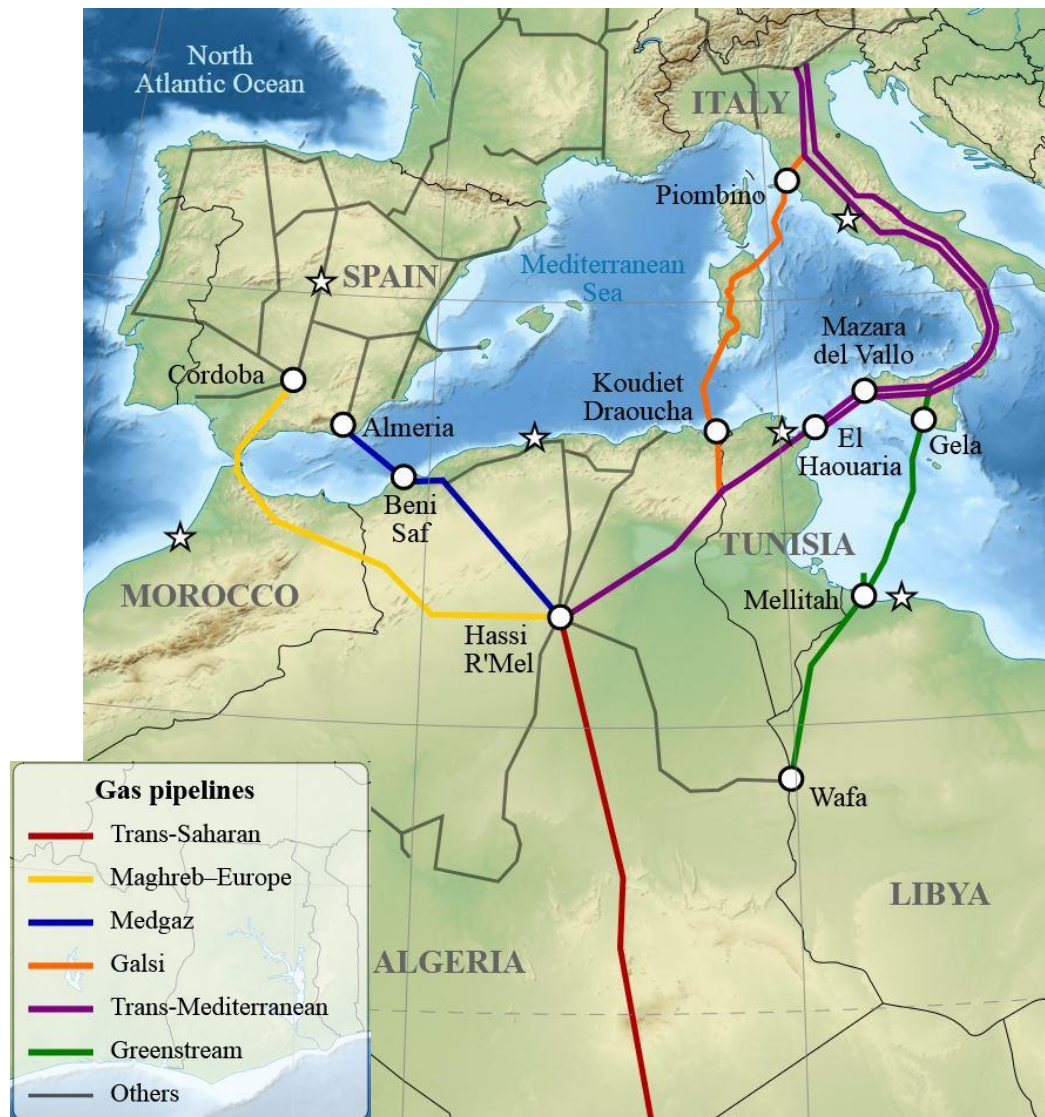

**Figure S3.** Route of the Algerian-Italian gas pipeline through Sicily.
